# Supplementary material for: Cobalt-porphine catalyzed CO2 electro-reduction: a novel protonation mechanism
Source: Royal Society of Chemistry journal article supplement (doi:10.1039/c7cp01881a), 2017-01-01
Supplement: c7cp01881a1.pdf [file c7cp01881a1.pdf]

## Supporting Information of “Cobalt-porphine Catalyzed CO<sub>2</sub> Electroreduction: A Novel Protonation Mechanism”

Cang lang Yao, Jian chen Li, Wang Gao\*, and Qing Jiang\*

Table S1. The free energy change ( $\Delta G$ ) of proposed steps from CO<sub>2</sub> to CO, and that of the formation of CoP-proton adduct and CoP-water adduct, each constituting part of  $\Delta G$  is listed.  $\Delta G = \Delta E - T \cdot \Delta S + \Delta ZPVE$ , in which  $\Delta E$  is the change of total energy,  $\Delta S$  is the change of (vibrational) entropy, T is temperature (298 K),  $\Delta ZPVE$  is the change of zero point vibrational energy. All energy data are in eV. Required reduction potentials of potential dependent steps are given in the parenthesis (V vs NHE).

| Step                                                         | $\Delta E$ | $-T \cdot \Delta S$ | $\Delta ZPVE$ | $\Delta G$    |
|--------------------------------------------------------------|------------|---------------------|---------------|---------------|
| $CoP + e^- \rightarrow CoP^-$                                | -3.07      | 0.005               | -0.06         | -3.13 (-1.15) |
| $CoP^- + e^- \rightarrow CoP^{2-}$                           | -2.28      | -0.02               | -0.17         | -2.47 (-1.81) |
| $CoP + H^+ \rightarrow [CoP \cdot H^+]$                      | -0.82      | 0.05                | 0.36          | -0.41         |
| $[CoP \cdot H^+] + e^- \rightarrow [CoP \cdot H]$            | -2.92      | -0.07               | -0.06         | -3.05 (-1.23) |
| $[CoP \cdot H] + e^- \rightarrow [CoP \cdot H]^-$            | -3.32      | -0.04               | -0.03         | -3.39 (-0.89) |
| $[CoP \cdot H]^- + CO_2 \rightarrow [CoP \cdot COOH]^-$      | -0.95      | 0.38                | 0.09          | -0.48         |
| $[CoP \cdot COOH]^- + H^+ \rightarrow [CoP \cdot CO] + H_2O$ | -0.36      | -0.62               | 0.04          | -0.94         |
| $CoP + H_2O \rightarrow [CoP \cdot H_2O]$                    | -0.78      | 0.36                | 0.10          | -0.32         |
| $[CoP \cdot 4H_2O] \rightarrow CoP + 4H_2O$                  | -0.04      | -0.49               | -0.06         | -0.59         |

Table S2. The free energy change ( $\Delta G$ ) of proposed steps from CO to hydrocarbons, each constituting part of  $\Delta G$  is listed.  $\Delta G = \Delta E - T \cdot \Delta S + \Delta ZPVE$ , in which  $\Delta E$  is the change of total energy,  $\Delta S$  is the change of (vibrational) entropy, T is temperature (298 K),  $\Delta ZPVE$  is the change of zero point vibrational energy. All energy data are in eV. Required reduction potentials of potential dependent steps are given in the parenthesis (V vs NHE).

| Step                                           | $\Delta E$ | $-T \cdot \Delta S$ | $\Delta ZPVE$ | $\Delta G$    |
|------------------------------------------------|------------|---------------------|---------------|---------------|
| $*CO + e^- \rightarrow *CO^-$                  | -2.97      | -0.01               | -0.02         | -3.00 (-1.28) |
| $*CO^- + H^+ \rightarrow *CHO$                 | -1.63      | 0.04                | 0.37          | -1.22         |
| $*CHO + e^- \rightarrow *CHO^-$                | -3.04      | -0.08               | -0.10         | -3.22 (-1.06) |
| $*CHO^- + H^+ \rightarrow *CHOH$               | -0.37      | 0.03                | 0.41          | 0.07          |
| $*CHOH + e^- \rightarrow *CHOH^-$              | -3.15      | -0.01               | -0.09         | -3.25 (-1.03) |
| $*CHOH^- + H^+ \rightarrow *CH_2OH$            | -3.44      | -0.01               | 0.43          | -3.02         |
| $*CH_2OH + e^- \rightarrow *CH_2OH^-$          | -3.00      | 0.02                | -0.08         | -3.06 (-1.23) |
| $*CH_2OH^- + H^+ \rightarrow *CH_3OH$          | -2.27      | -0.51               | 0.32          | -2.46         |
| $*CH_3OH + H^+ + e^- \rightarrow CH_4 + *OH$   | -0.27      | 0.20                | -0.18         | -0.25         |
| $*CH_3OH + H^+ + e^- \rightarrow *CH_3 + H_2O$ | 0.30       | 0.20                | 0.01          | 0.51          |
| $*OH + H^+ + e^- \rightarrow H_2O$             | -0.57      | -0.29               | 0.28          | -0.58         |
| $*CO^- + H^+ \rightarrow *COH$                 | -0.11      | 0.02                | 0.30          | 0.21          |
| $*CHO^- + H^+ \rightarrow *OCH_2$              | -1.94      | -0.08               | 0.37          | -1.65         |
| $*OCH_2 + e^- \rightarrow *OCH_2^-$            | -3.12      | -0.02               | -0.31         | -3.45 (-1.03) |
| $*OCH_2^- + H^+ \rightarrow *OCH_3$            | -1.28      | 0.14                | 0.40          | -0.74         |
| $*OCH_3 + e^- \rightarrow *OCH_3^-$            | -4.05      | 0.02                | 0.10          | -3.93 (-0.35) |
| $*OCH_3^- + H^+ \rightarrow *O + CH_4$         | 1.41       | -0.54               | 0.24          | 1.11          |
| $*OCH_3^- + e^- \rightarrow CH_3OH$            | -1.63      | -0.54               | 0.43          | -1.74         |
| $*CHOH^- + H^+ \rightarrow *CH + H_2O$         | 0.49       | -0.45               | 0.15          | 0.19          |
| $*CH_2OH^- + H^+ \rightarrow *CH_2 + H_2O$     | 0.32       | -0.60               | 0.08          | -0.20         |

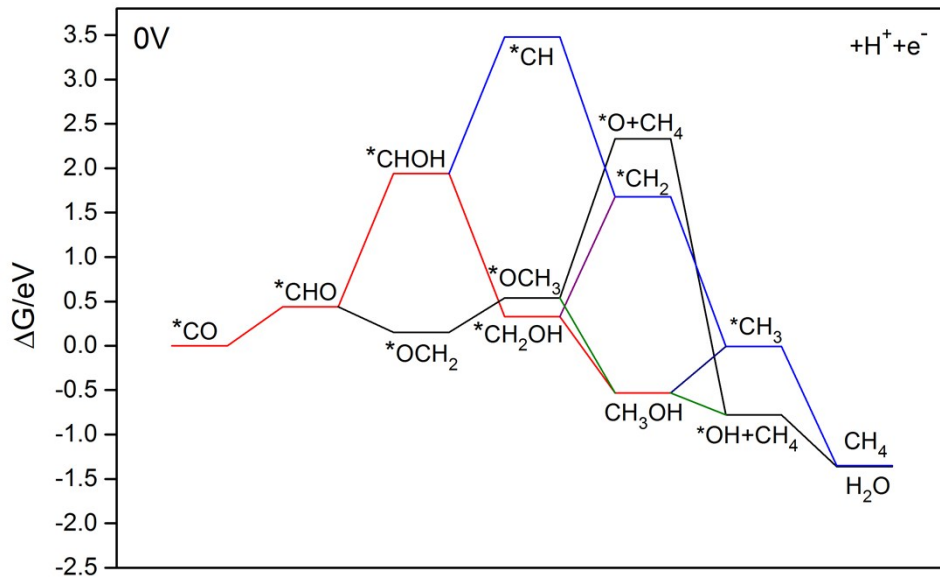

Figure S1. Reduction pathway from CO to methanol/methane with CPET (concerted proton and electron transferring) scheme.
